# Supplementary material
Source: publisher figshare collection journal article supplement (https://gsajournals.figshare.com/ndownloader/files/25800068)
Supplement: Supplementary file 1 [file 25800068]

## Sheet: Sheet1
Cluster 2A	Cluster 2B	Cluster 2 core	Cluster 7 core	Cluster 9 core
ID	ID	ID	ID	ID
FBgn0053679	FBgn0032801	FBgn0003515	FBgn0032475	FBgn0034184
FBgn0035608	FBgn0032800	FBgn0263086	FBgn0035901	FBgn0030230
FBgn0261815	FBgn0050178	FBgn0032221	FBgn0034614	FBgn0038545
FBgn0028412	FBgn0028418	FBgn0263557	FBgn0035298	FBgn0030491
FBgn0030723	FBgn0259214	FBgn0034180	FBgn0053461	FBgn0001263
FBgn0003720	FBgn0259738	FBgn0030514	FBgn0263081	FBgn0028979
FBgn0041707	FBgn0259739	FBgn0036962	FBgn0024222	FBgn0037721
FBgn0052100	FBgn0035855	FBgn0033438	FBgn0263552	FBgn0019650
FBgn0003187	FBgn0259993	FBgn0041706	FBgn0031977	FBgn0031090
FBgn0000578	FBgn0031270	FBgn0051226	FBgn0031974	FBgn0085278
FBgn0036585	FBgn0027865	FBgn0000346	FBgn0031975	FBgn0032723
FBgn0051030	FBgn0085391	FBgn0032801	FBgn0086695	FBgn0042135
FBgn0037766	FBgn0053333	FBgn0032800	FBgn0086691	FBgn0037120
FBgn0051057	FBgn0034135	FBgn0050178	FBgn0036254	FBgn0035409
FBgn0263648	FBgn0034437	FBgn0036585	FBgn0038428	FBgn0085293
FBgn0031675	FBgn0038725	FBgn0035608	FBgn0011762	FBgn0036660
FBgn0036285	FBgn0030391	FBgn0261815	FBgn0011763	FBgn0015907
FBgn0038330	FBgn0011987	FBgn0028412	FBgn0033766	FBgn0000636
FBgn0039883	FBgn0034154	FBgn0259214	FBgn0034232	FBgn0033154
FBgn0050101	FBgn0029962	FBgn0003720	FBgn0031020	FBgn0031314
FBgn0033168	FBgn0052590	FBgn0041707	FBgn0037490	FBgn0030996
FBgn0004567	FBgn0262315	FBgn0003187	FBgn0015577	FBgn0051125
FBgn0039170	FBgn0031473	FBgn0000578	FBgn0033762	FBgn0000179
FBgn0035246	FBgn0262886	FBgn0259738	FBgn0038294	FBgn0031740
FBgn0259481	FBgn0032516	FBgn0259739	FBgn0023143	FBgn0039738
FBgn0052676	FBgn0039277	FBgn0030723	FBgn0085311	FBgn0039733
FBgn0052677	FBgn0037930	FBgn0051030	FBgn0051955	FBgn0034958
FBgn0052675	FBgn0034356	FBgn0051697	FBgn0085260	FBgn0027538
FBgn0011279	FBgn0037551	FBgn0051690	FBgn0037439	FBgn0038047
FBgn0051697	FBgn0023179	FBgn0038540	FBgn0261564	FBgn0033440
FBgn0051690	FBgn0085279	FBgn0035855	FBgn0036812	FBgn0037579
FBgn0038540	FBgn0262339	FBgn0005636	FBgn0262467	FBgn0263630
FBgn0005636	FBgn0086076	FBgn0261545	FBgn0029507	FBgn0263611
FBgn0261545	FBgn0042132	FBgn0259993	FBgn0026679	FBgn0050497
FBgn0259994	FBgn0053481	FBgn0259994	FBgn0031452	FBgn0033108
FBgn0039064	FBgn0028370	FBgn0039064	FBgn0261381	FBgn0259743
FBgn0003353	FBgn0033429	FBgn0031270	FBgn0261385	FBgn0259174
FBgn0263649	FBgn0025549	FBgn0003353	FBgn0033092	FBgn0083959
FBgn0016672	FBgn0050449	FBgn0263648	FBgn0035194	FBgn0031214
FBgn0028888	FBgn0002774	FBgn0016672	FBgn0028988	FBgn0039065
FBgn0050115	FBgn0025625	FBgn0027865	FBgn0024846	FBgn0000246
FBgn0083952	FBgn0000615	FBgn0028888	FBgn0010612	FBgn0036062
FBgn0026375	FBgn0263391	FBgn0050115	FBgn0039558	FBgn0028482
FBgn0051646	FBgn0002962	FBgn0083952	FBgn0039559	FBgn0004390
FBgn0030892	FBgn0053723	FBgn0026375	FBgn0061200	FBgn0031044
FBgn0010105	FBgn0029986	FBgn0051646	FBgn0037250	FBgn0038504
FBgn0035132	FBgn0032946	FBgn0030892	FBgn0038746	FBgn0030010
FBgn0051051	FBgn0013973	FBgn0010105	FBgn0038747	FBgn0000054
FBgn0259927	FBgn0085314	FBgn0035132	FBgn0034988	FBgn0034886
FBgn0261556	FBgn0035235	FBgn0051051	FBgn0010228	FBgn0041160
FBgn0259923	FBgn0038975	FBgn0051057	FBgn0040104	FBgn0034693
FBgn0035153	FBgn0039149	FBgn0259927	FBgn0051739	FBgn0029006
FBgn0031627	FBgn0037789	FBgn0261556	FBgn0037186	FBgn0031393
FBgn0038098	FBgn0032202	FBgn0085391	FBgn0032805	FBgn0003866
FBgn0040388	FBgn0259822	FBgn0259923	FBgn0035462	FBgn0052111
FBgn0026592	FBgn0003386	FBgn0053333	FBgn0024332	FBgn0031575
FBgn0030399	FBgn0035255	FBgn0035153	FBgn0263316	FBgn0086081
FBgn0030396	FBgn0037313	FBgn0034437	FBgn0038597	FBgn0053182
FBgn0050098	FBgn0085371	FBgn0038725	FBgn0020503	FBgn0030508
FBgn0000320	FBgn0038343	FBgn0031627	FBgn0030276	FBgn0039508
FBgn0020620	FBgn0033054	FBgn0038098	FBgn0033600	FBgn0038043
FBgn0032821	FBgn0052600	FBgn0034135	FBgn0034471	FBgn0029979
FBgn0013725	FBgn0262194	FBgn0040388	FBgn0052104	FBgn0023534
FBgn0032533	FBgn0030351	FBgn0026592	FBgn0040658	FBgn0035157
FBgn0029746	FBgn0005586	FBgn0030399	FBgn0030237	FBgn0031434
FBgn0037950	FBgn0020248	FBgn0030396	FBgn0003189	FBgn0033644
FBgn0010504	FBgn0052057	FBgn0030391	FBgn0259736	FBgn0000337
FBgn0038282	FBgn0262214	FBgn0020620	FBgn0030724	FBgn0005558
FBgn0026438	FBgn0035593	FBgn0011987	FBgn0030720	FBgn0025676
FBgn0261570	FBgn0086704	FBgn0032821	FBgn0030729	FBgn0038292
FBgn0037666	FBgn0052486	FBgn0013725	FBgn0011638	FBgn0046302
FBgn0033159	FBgn0260441	FBgn0034154	FBgn0050343	FBgn0037432
FBgn0031429	FBgn0039129	FBgn0032533	FBgn0050345	FBgn0013718
FBgn0043530	FBgn0034093	FBgn0029746	FBgn0050349	FBgn0035199
FBgn0050361	FBgn0053136	FBgn0037950	FBgn0027500	FBgn0262857
FBgn0021800	FBgn0262636	FBgn0029962	FBgn0032848	FBgn0026878
FBgn0023520	FBgn0032638	FBgn0038282	FBgn0037513	FBgn0003116
FBgn0023526	FBgn0051202	FBgn0026438	FBgn0040733	FBgn0003118
FBgn0000017	FBgn0030893	FBgn0021800	FBgn0023507	FBgn0083989
FBgn0035833	FBgn0083972	FBgn0050098	FBgn0019938	FBgn0037678
FBgn0260486	FBgn0035942	FBgn0262315	FBgn0035027	FBgn0031530
FBgn0019968	FBgn0085460	FBgn0023520	FBgn0029506	FBgn0036927
FBgn0038749	FBgn0032022	FBgn0023526	FBgn0030217	FBgn0031453
FBgn0262509	FBgn0029839	FBgn0261570	FBgn0035853	FBgn0040964
FBgn0262081	FBgn0033032	FBgn0037666	FBgn0035854	FBgn0032896
FBgn0039479	FBgn0052192	FBgn0033159	FBgn0053196	FBgn0003175
FBgn0034051	FBgn0026718	FBgn0031429	FBgn0053199	FBgn0024753
FBgn0033137	FBgn0035570	FBgn0043530	FBgn0003060	FBgn0250862
FBgn0050421	FBgn0052761	FBgn0035833	FBgn0261555	FBgn0015919
FBgn0050420	FBgn0039908	FBgn0260486	FBgn0035148	FBgn0015402
FBgn0033392	FBgn0261016	FBgn0019968	FBgn0033846	FBgn0015772
FBgn0033132	FBgn0028481	FBgn0038749	FBgn0038727	FBgn0037794
FBgn0250785	FBgn0036890	FBgn0262886	FBgn0038721	FBgn0052043
FBgn0032519	FBgn0036893	FBgn0262081	FBgn0038722	FBgn0051660
FBgn0037556	FBgn0026262	FBgn0039479	FBgn0052311	FBgn0026319
FBgn0085273	FBgn0051807	FBgn0034051	FBgn0010808	FBgn0050287
FBgn0010014	FBgn0262382	FBgn0033137	FBgn0031629	FBgn0050286
FBgn0028953	FBgn0032428	FBgn0050421	FBgn0031322	FBgn0035245
FBgn0052423	FBgn0261090	FBgn0050420	FBgn0262686	FBgn0031829
FBgn0039640	FBgn0034269	FBgn0033392	FBgn0030398	FBgn0000163
FBgn0031097	FBgn0039900	FBgn0033132	FBgn0040383	FBgn0035158
FBgn0034602	FBgn0054038	FBgn0250785	FBgn0051755	FBgn0263414
FBgn0036986	FBgn0051510	FBgn0262509	FBgn0051201	FBgn0037538
FBgn0034301	FBgn0030592	FBgn0032519	FBgn0031321	FBgn0051072
FBgn0261514	FBgn0261287	FBgn0039277	FBgn0030394	FBgn0031287
FBgn0033802	FBgn0033799	FBgn0032516	FBgn0034310	FBgn0026179
FBgn0014010	FBgn0259222	FBgn0037930	FBgn0025866	FBgn0015618
FBgn0027280	FBgn0039028	FBgn0039640	FBgn0016983	FBgn0034091
FBgn0038320	FBgn0031239	FBgn0034602	FBgn0039419	FBgn0015296
FBgn0005561	FBgn0031811	FBgn0034356	FBgn0034938	FBgn0035769
FBgn0015721	FBgn0051226	FBgn0037556	FBgn0037700	FBgn0031735
FBgn0029708	FBgn0263344	FBgn0023179	FBgn0037709	FBgn0029826
FBgn0262483	FBgn0086782	FBgn0010014	FBgn0037708	FBgn0029821
FBgn0020224	FBgn0028879	FBgn0262339	FBgn0050404	FBgn0034965
FBgn0026239	FBgn0261575	FBgn0086076	FBgn0263330	FBgn0015269
FBgn0051632	FBgn0038916	FBgn0042132	FBgn0016917	FBgn0083034
FBgn0001229	FBgn0000370	FBgn0053481	FBgn0035443	FBgn0032600
FBgn0053179	FBgn0036591	FBgn0028370	FBgn0033668	FBgn0036196
FBgn0005694	FBgn0036224	FBgn0033429	FBgn0033661	FBgn0039507
FBgn0035211	FBgn0027494	FBgn0028953	FBgn0032393	FBgn0259986
FBgn0015229	FBgn0261803	FBgn0052423	FBgn0032390	FBgn0029843
FBgn0042110	FBgn0050355	FBgn0036986	FBgn0039252	FBgn0033028
FBgn0052406	FBgn0004242	FBgn0261514	FBgn0037955	FBgn0037844
FBgn0037107	FBgn0004244	FBgn0025549	FBgn0085307	FBgn0263706
FBgn0052407	FBgn0037191	FBgn0033802	FBgn0037958	FBgn0261610
FBgn0031463	FBgn0000357	FBgn0014010	FBgn0039627	FBgn0039335
FBgn0261397	FBgn0033677	FBgn0050449	FBgn0038420	FBgn0086661
FBgn0034656	FBgn0032484	FBgn0027280	FBgn0029969	FBgn0033905
FBgn0000635	FBgn0031906	FBgn0038320	FBgn0027524	FBgn0263258
FBgn0010197	FBgn0259707	FBgn0002774	FBgn0027521	FBgn0036115
FBgn0038303	FBgn0004102	FBgn0015721	FBgn0030259	FBgn0030963
FBgn0004575	FBgn0031526	FBgn0005561	FBgn0040717	FBgn0015371
FBgn0026197	FBgn0034008	FBgn0025625	FBgn0015040	FBgn0033439
FBgn0032225	FBgn0025692	FBgn0029708	FBgn0030251	FBgn0003525
FBgn0032088	FBgn0262974	FBgn0262483	FBgn0036157	FBgn0033782
FBgn0035021	FBgn0050379	FBgn0020224	FBgn0040718	FBgn0027950
FBgn0038547	FBgn0262891	FBgn0026239	FBgn0050360	FBgn0034270
FBgn0261259	FBgn0033872	FBgn0051632	FBgn0034495	FBgn0032846
FBgn0003366	FBgn0040390	FBgn0001229	FBgn0013269
FBgn0024913	FBgn0033657	FBgn0053179	FBgn0030871
FBgn0026320	FBgn0000529	FBgn0005694	FBgn0032701
FBgn0031858	FBgn0030247	FBgn0035211	FBgn0038877
FBgn0034315	FBgn0036144	FBgn0015229	FBgn0038400
FBgn0051619	FBgn0058178	FBgn0042110	FBgn0035558
FBgn0032943	FBgn0086049	FBgn0052406	FBgn0023527
FBgn0032940	FBgn0052369	FBgn0031463	FBgn0261995
FBgn0086032	FBgn0041605	FBgn0037107	FBgn0087013
FBgn0020440	FBgn0069969	FBgn0000615	FBgn0033367
FBgn0262739	FBgn0052177	FBgn0261397	FBgn0038919
FBgn0263117	FBgn0053774	FBgn0000635	FBgn0035164
FBgn0027589	FBgn0259740	FBgn0263391	FBgn0037661
FBgn0027583	FBgn0040079	FBgn0034301	FBgn0035162
FBgn0053978	FBgn0085421	FBgn0010197	FBgn0263594
FBgn0052039	FBgn0036618	FBgn0038303	FBgn0263599
FBgn0004635	FBgn0086062	FBgn0004575	FBgn0263598
FBgn0065070	FBgn0066365	FBgn0026197	FBgn0031399
FBgn0035236	FBgn0262213	FBgn0032088	FBgn0028974
FBgn0035237	FBgn0259972	FBgn0032225	FBgn0010770
FBgn0263029	FBgn0031476	FBgn0035021	FBgn0031649
FBgn0043550	FBgn0037130	FBgn0038547	FBgn0262880
FBgn0034788	FBgn0025833	FBgn0261259	FBgn0002878
FBgn0039492	FBgn0039923	FBgn0003366	FBgn0260817
FBgn0034789	FBgn0033347	FBgn0024913	FBgn0261688
FBgn0036780	FBgn0262282	FBgn0026320	FBgn0037728
FBgn0030174	FBgn0010497	FBgn0029986	FBgn0003134
FBgn0037780	FBgn0051997	FBgn0031858	FBgn0039474
FBgn0033153	FBgn0036679	FBgn0034315	FBgn0039471
FBgn0010315	FBgn0086913	FBgn0051619	FBgn0039470
FBgn0010235	FBgn0038946	FBgn0263117	FBgn0037723
FBgn0002567	FBgn0027101	FBgn0027583	FBgn0029155
FBgn0259823	FBgn0033145	FBgn0032943	FBgn0032921
FBgn0020269	FBgn0013753	FBgn0032940	FBgn0010482
FBgn0051038	FBgn0064227	FBgn0032946	FBgn0004028
FBgn0035258	FBgn0032234	FBgn0086032	FBgn0020545
FBgn0051676	FBgn0038143	FBgn0020440	FBgn0037504
FBgn0014179	FBgn0050021	FBgn0013973	FBgn0040505
FBgn0004431	FBgn0032935	FBgn0004635	FBgn0039897
FBgn0004435	FBgn0033558	FBgn0035235	FBgn0034237
FBgn0004381	FBgn0052657	FBgn0035237	FBgn0035393
FBgn0035253	FBgn0052382	FBgn0035236	FBgn0035398
FBgn0035229	FBgn0052383	FBgn0263029	FBgn0040553
FBgn0250876	FBgn0033798	FBgn0038975	FBgn0029764
FBgn0260400	FBgn0039487	FBgn0043550	FBgn0000533
FBgn0260660	FBgn0039480	FBgn0034788	FBgn0039644
FBgn0039167	FBgn0036225	FBgn0262739	FBgn0031091
FBgn0000382	FBgn0037798	FBgn0039149	FBgn0031093
FBgn0038694	FBgn0040900	FBgn0039492	FBgn0031094
FBgn0037412	FBgn0038165	FBgn0034789	FBgn0039355
FBgn0052227	FBgn0032911	FBgn0030174	FBgn0011361
FBgn0030193	FBgn0035243	FBgn0037780	FBgn0039274
FBgn0030192	FBgn0013305	FBgn0010315	FBgn0029766
FBgn0028863	FBgn0039282	FBgn0010235	FBgn0034603
FBgn0037336	FBgn0034539	FBgn0032202	FBgn0025640
FBgn0051658	FBgn0260995	FBgn0002567	FBgn0025643
FBgn0028862	FBgn0040928	FBgn0259822	FBgn0039227
FBgn0003996	FBgn0085281	FBgn0259823	FBgn0025645
FBgn0015946	FBgn0035995	FBgn0020269	FBgn0034162
FBgn0037238	FBgn0261928	FBgn0051038	FBgn0031893
FBgn0002735	FBgn0053202	FBgn0051676	FBgn0027091
FBgn0243486	FBgn0043021	FBgn0037313	FBgn0034351
FBgn0002734	FBgn0000216	FBgn0014179	FBgn0030272
FBgn0260461	FBgn0259146	FBgn0004435	FBgn0036600
FBgn0003285	FBgn0259145	FBgn0004381	FBgn0038114
FBgn0031597	FBgn0262381	FBgn0035253	FBgn0038118
FBgn0030421	FBgn0053547	FBgn0035229	FBgn0053156
FBgn0053007	FBgn0263456	FBgn0250876	FBgn0040268
FBgn0086778	FBgn0032017	FBgn0260400	FBgn0010549
FBgn0086779	FBgn0032013	FBgn0260660	FBgn0026415
FBgn0031762	FBgn0030479	FBgn0039167	FBgn0026418
FBgn0031100	FBgn0040649	FBgn0000382	FBgn0037248
FBgn0030358	FBgn0030065	FBgn0038694	FBgn0021825
FBgn0030359	FBgn0037014	FBgn0037412	FBgn0026576
FBgn0036813	FBgn0262437	FBgn0038343	FBgn0030851
FBgn0010905	FBgn0262433	FBgn0030193	FBgn0030854
FBgn0036814	FBgn0261041	FBgn0030192	FBgn0030855
FBgn0010350	FBgn0259985	FBgn0028863	FBgn0032725
FBgn0085429	FBgn0010408	FBgn0037336	FBgn0053158
FBgn0085423	FBgn0029846	FBgn0051658	FBgn0038871
FBgn0004880	FBgn0026393	FBgn0028862	FBgn0028377
FBgn0032451	FBgn0050201	FBgn0003996	FBgn0263020
FBgn0032249	FBgn0263557	FBgn0037238	FBgn0020018
FBgn0039294	FBgn0053988	FBgn0243486	FBgn0028371
FBgn0029123	FBgn0083974	FBgn0002734	FBgn0035189
FBgn0031745	FBgn0263086	FBgn0002735	FBgn0031253
FBgn0051108	FBgn0036926	FBgn0052600	FBgn0052428
FBgn0040281	FBgn0030559	FBgn0260461	FBgn0031700
FBgn0034959	FBgn0032367	FBgn0262194	FBgn0000490
FBgn0036008	FBgn0262397	FBgn0003285	FBgn0039182
FBgn0034172	FBgn0259239	FBgn0031597	FBgn0039183
FBgn0003510	FBgn0085304	FBgn0030351	FBgn0039459
FBgn0260446	FBgn0053513	FBgn0030421	FBgn0033806
FBgn0003267	FBgn0085218	FBgn0052227	FBgn0034299
FBgn0250910	FBgn0260874	FBgn0005586	FBgn0014019
FBgn0263445	FBgn0038247	FBgn0053007	FBgn0003178
FBgn0034725	FBgn0005672	FBgn0086778	FBgn0050118
FBgn0038385	FBgn0035815	FBgn0086779	FBgn0250815
FBgn0260943	FBgn0263575	FBgn0020248	FBgn0036290
FBgn0085403	FBgn0262406	FBgn0031762	FBgn0002773
FBgn0028509	FBgn0037100	FBgn0052057	FBgn0035400
FBgn0037015	FBgn0010258	FBgn0031100	FBgn0033113
FBgn0035719	FBgn0002937	FBgn0030358	FBgn0001078
FBgn0039329	FBgn0038248	FBgn0030359	FBgn0035831
FBgn0039328	FBgn0034255	FBgn0036813	FBgn0004556
FBgn0260780	FBgn0035504	FBgn0036814	FBgn0004552
FBgn0052544	FBgn0035505	FBgn0085429	FBgn0013765
FBgn0029105	FBgn0262262	FBgn0085423	FBgn0013763
FBgn0000206	FBgn0031268	FBgn0262214	FBgn0024698
FBgn0259150	FBgn0000273	FBgn0004880	FBgn0025621
FBgn0038042	FBgn0037696	FBgn0032451	FBgn0039210
FBgn0034396	FBgn0031746	FBgn0032249	FBgn0029704
FBgn0037166		FBgn0039294	FBgn0086711
FBgn0029814		FBgn0035593	FBgn0086712
FBgn0010583		FBgn0086704	FBgn0003124
FBgn0034978		FBgn0029123	FBgn0003129
FBgn0034950		FBgn0031745	FBgn0027654
FBgn0034155		FBgn0052039	FBgn0259784
FBgn0028991		FBgn0010905	FBgn0259750
FBgn0032633		FBgn0051108	FBgn0003346
FBgn0035943		FBgn0040281	FBgn0026252
FBgn0028996		FBgn0034959	FBgn0051548
FBgn0028999		FBgn0036008	FBgn0027872
FBgn0034708		FBgn0034172	FBgn0031875
FBgn0038676		FBgn0003510	FBgn0031878
FBgn0052206		FBgn0052486	FBgn0024558
FBgn0261788		FBgn0260441	FBgn0051633
FBgn0004841		FBgn0003267	FBgn0040060
FBgn0037736		FBgn0039129	FBgn0034335
FBgn0036882		FBgn0250910	FBgn0040066
FBgn0033484		FBgn0263445	FBgn0038575
FBgn0035086		FBgn0034093	FBgn0010382
FBgn0067102		FBgn0034725	FBgn0020642
FBgn0003651		FBgn0260943	FBgn0030836
FBgn0019662		FBgn0085403	FBgn0051898
FBgn0040465		FBgn0028509	FBgn0037890
FBgn0031257		FBgn0035719	FBgn0085290
FBgn0035445		FBgn0039329	FBgn0036663
FBgn0259173		FBgn0039328	FBgn0036661
FBgn0030613		FBgn0052544	FBgn0032961
FBgn0011701		FBgn0029105	FBgn0001197
FBgn0000346		FBgn0000206	FBgn0051326
FBgn0085448		FBgn0034396	FBgn0013954
FBgn0085442		FBgn0037166	FBgn0053178
FBgn0004795		FBgn0030893	FBgn0011802
FBgn0063127		FBgn0029814	FBgn0005696
FBgn0037050		FBgn0010583	FBgn0035213
FBgn0004108		FBgn0034978	FBgn0001995
FBgn0263109		FBgn0083972	FBgn0032886
FBgn0038588		FBgn0038042	FBgn0035210
FBgn0038853		FBgn0034950	FBgn0083956
FBgn0035347		FBgn0034155	FBgn0086908
FBgn0039255		FBgn0028991	FBgn0086906
FBgn0031064		FBgn0032633	FBgn0250837
FBgn0031065		FBgn0032638	FBgn0052409
FBgn0038612		FBgn0035943	FBgn0052404
FBgn0015663		FBgn0035942	FBgn0261535
FBgn0023388		FBgn0028996	FBgn0020439
FBgn0262423		FBgn0028999	FBgn0036510
FBgn0086679		FBgn0038676	FBgn0030482
FBgn0086677		FBgn0052206	FBgn0085344
FBgn0029834		FBgn0261788	FBgn0261394
FBgn0029835		FBgn0000017	FBgn0015925
FBgn0029838		FBgn0032022	FBgn0034307
FBgn0033250		FBgn0004841	FBgn0015926
FBgn0083950		FBgn0037736	FBgn0015929
FBgn0032409		FBgn0036882	FBgn0014033
FBgn0001987		FBgn0033484	FBgn0033354
FBgn0030581		FBgn0035086	FBgn0034814
FBgn0000242		FBgn0067102	FBgn0038306
FBgn0031920		FBgn0003651	FBgn0033688
FBgn0031187		FBgn0019662	FBgn0033174
FBgn0040995		FBgn0031257	FBgn0026196
FBgn0038828		FBgn0035445	FBgn0013746
FBgn0034939		FBgn0259173	FBgn0025355
FBgn0040336		FBgn0030613	FBgn0016041
FBgn0004369		FBgn0011701	FBgn0032229
FBgn0004366		FBgn0029839	FBgn0032224
FBgn0022981		FBgn0029834	FBgn0029723
FBgn0037636		FBgn0029838	FBgn0035025
FBgn0259935		FBgn0033250	FBgn0035026
FBgn0031923		FBgn0083950	FBgn0261703
FBgn0034408		FBgn0033032	FBgn0031851
FBgn0042205		FBgn0040465	FBgn0038473
FBgn0039622		FBgn0015663	FBgn0034314
FBgn0032629		FBgn0023388	FBgn0010053
FBgn0024836		FBgn0262423	FBgn0000283
FBgn0002921		FBgn0086679	FBgn0027586
FBgn0033915		FBgn0086677	FBgn0027585
FBgn0026616		FBgn0035347	FBgn0037669
FBgn0050009		FBgn0039255	FBgn0004907
FBgn0039530		FBgn0052192	FBgn0004901
FBgn0034403		FBgn0031064	FBgn0027329
FBgn0052529		FBgn0031065	FBgn0020443
FBgn0032421		FBgn0038612	FBgn0039860
FBgn0010473		FBgn0063127	FBgn0011828
FBgn0036935		FBgn0026718	FBgn0011823
FBgn0032305		FBgn0085448	FBgn0033549
FBgn0001087		FBgn0085442	FBgn0033547
FBgn0001083		FBgn0004795	FBgn0085317
FBgn0054034		FBgn0037050	FBgn0250814
FBgn0025186		FBgn0004108	FBgn0260398
FBgn0036896		FBgn0038588	FBgn0034420
FBgn0031195		FBgn0038853	FBgn0039140
FBgn0034013		FBgn0035570	FBgn0038365
FBgn0034644		FBgn0032409	FBgn0031449
FBgn0027550		FBgn0052761	FBgn0037473
FBgn0050419		FBgn0001987	FBgn0037782
FBgn0259224		FBgn0030581	FBgn0037894
FBgn0038583		FBgn0000242	FBgn0011591
FBgn0000108		FBgn0031187	FBgn0037781
FBgn0037099		FBgn0040995	FBgn0015903
FBgn0085481		FBgn0038828	FBgn0033372
FBgn0261284		FBgn0034939	FBgn0004913
FBgn0037092		FBgn0040336	FBgn0034879
FBgn0039808		FBgn0004369	FBgn0263396
FBgn0259221		FBgn0004366	FBgn0004430
FBgn0039026		FBgn0022981	FBgn0014141
FBgn0029894		FBgn0037636	FBgn0034870
FBgn0033654		FBgn0259935	FBgn0034878
FBgn0030017		FBgn0028481	FBgn0015245
FBgn0030011		FBgn0031923	FBgn0030170
FBgn0036911		FBgn0034408	FBgn0030177
FBgn0036202		FBgn0042205	FBgn0010314
FBgn0027491		FBgn0024836	FBgn0040290
FBgn0032147		FBgn0002921	FBgn0032209
FBgn0033095		FBgn0036890	FBgn0002562
FBgn0032401		FBgn0036893	FBgn0002564
FBgn0035677		FBgn0033915	FBgn0086758
FBgn0035676		FBgn0026616	FBgn0003162
FBgn0003710		FBgn0050009	FBgn0042092
FBgn0031104		FBgn0032629	FBgn0022359
FBgn0043070		FBgn0039530	FBgn0022355
FBgn0261444		FBgn0034403	FBgn0035002
FBgn0037525		FBgn0262382	FBgn0261276
FBgn0052702		FBgn0052529	FBgn0261270
FBgn0000097		FBgn0032428	FBgn0031836
FBgn0011666		FBgn0261090	FBgn0052075
FBgn0027575		FBgn0036935	FBgn0040232
FBgn0262733		FBgn0034269	FBgn0259791
FBgn0262730		FBgn0010473	FBgn0011692
FBgn0085401		FBgn0039900	FBgn0011695
FBgn0263569		FBgn0032305	FBgn0040793
FBgn0262699		FBgn0001087	FBgn0051673
FBgn0259246		FBgn0001083	FBgn0051216
FBgn0032462		FBgn0039908	FBgn0261850
FBgn0259244		FBgn0054034	FBgn0004652
FBgn0039005		FBgn0054038	FBgn0086680
FBgn0259241		FBgn0025186	FBgn0086687
FBgn0039000		FBgn0051510	FBgn0033526
FBgn0261572		FBgn0036896	FBgn0033523
FBgn0031610		FBgn0031195	FBgn0028685
FBgn0262477		FBgn0034013	FBgn0039339
FBgn0040357		FBgn0034644	FBgn0038996
FBgn0040351		FBgn0030592	FBgn0250874
FBgn0010329		FBgn0085481	FBgn0033458
FBgn0037339		FBgn0037099	FBgn0025140
FBgn0033770		FBgn0261287	FBgn0259676
FBgn0032123		FBgn0037092	FBgn0039164
FBgn0037754		FBgn0027550	FBgn0038269
FBgn0005649		FBgn0050419	FBgn0011202
FBgn0032876		FBgn0259224	FBgn0038968
FBgn0032879		FBgn0038583	FBgn0033316
FBgn0031397		FBgn0033799	FBgn0034856
FBgn0035477		FBgn0000108	FBgn0038349
FBgn0261801		FBgn0259222	FBgn0038347
FBgn0002932		FBgn0259221	FBgn0042094
FBgn0002023		FBgn0039028	FBgn0030196
FBgn0000568		FBgn0039026	FBgn0004507
FBgn0040726		FBgn0031239	FBgn0051800
FBgn0015520		FBgn0029894	FBgn0030997
FBgn0260720		FBgn0030011	FBgn0260986
FBgn0036360		FBgn0036911	FBgn0260985
FBgn0027515		FBgn0036202	FBgn0032819
FBgn0032485		FBgn0031811	FBgn0041186
FBgn0003053		FBgn0027491	FBgn0053099
FBgn0033500		FBgn0032147	FBgn0002542
FBgn0263097		FBgn0033095	FBgn0003149
FBgn0035285		FBgn0032401	FBgn0028274
FBgn0035903		FBgn0039808	FBgn0022338
FBgn0039916		FBgn0035677	FBgn0035064
FBgn0032810		FBgn0035676	FBgn0035063
FBgn0004052		FBgn0263344	FBgn0031764
FBgn0003888		FBgn0003710	FBgn0010926
FBgn0028400		FBgn0043070	FBgn0026143
FBgn0002592		FBgn0261444	FBgn0026149
FBgn0035636		FBgn0037525	FBgn0051159
FBgn0040271		FBgn0000097	FBgn0051126
FBgn0025641		FBgn0011666	FBgn0026361
FBgn0052137		FBgn0027575	FBgn0039751
FBgn0052132		FBgn0262733	FBgn0037338
FBgn0037949		FBgn0262730	FBgn0020639
FBgn0030249		FBgn0052702	FBgn0020493
FBgn0030248		FBgn0028879	FBgn0004419
FBgn0033447		FBgn0263569	FBgn0032906
FBgn0036380		FBgn0262699	FBgn0037330
FBgn0032719		FBgn0261575	FBgn0020497
FBgn0037309		FBgn0259246	FBgn0036742
FBgn0030869		FBgn0032462	FBgn0261933
FBgn0023531		FBgn0259244	FBgn0261938
FBgn0039381		FBgn0039005	FBgn0031832
FBgn0046704		FBgn0259241	FBgn0250850
FBgn0087007		FBgn0039000	FBgn0002736
FBgn0034158		FBgn0261572	FBgn0053519
FBgn0031381		FBgn0038916	FBgn0036502
FBgn0017590		FBgn0031610	FBgn0037057
FBgn0040391		FBgn0262477	FBgn0036815
FBgn0040397		FBgn0040357	FBgn0033998
FBgn0032838		FBgn0040351	FBgn0035896
FBgn0028421		FBgn0037339	FBgn0003062
FBgn0037923		FBgn0000370	FBgn0034528
FBgn0031775		FBgn0033770	FBgn0002909
FBgn0033876		FBgn0037754	FBgn0020756
FBgn0040395		FBgn0032876	FBgn0085359
FBgn0259099		FBgn0032879	FBgn0050196
FBgn0031697		FBgn0031397	FBgn0085354
FBgn0033243		FBgn0005649	FBgn0004888
FBgn0029761		FBgn0002932	FBgn0033194
FBgn0030847		FBgn0002023	FBgn0033195
FBgn0052815		FBgn0040726	FBgn0004087
FBgn0261984		FBgn0015520	FBgn0003067
FBgn0028369		FBgn0260720	FBgn0032244
FBgn0035179		FBgn0004242	FBgn0039293
FBgn0020391		FBgn0004244	FBgn0014455
FBgn0035171		FBgn0027515	FBgn0001612
FBgn0033815		FBgn0032485	FBgn0014454
FBgn0002609		FBgn0003053	FBgn0035590
FBgn0052179		FBgn0263097	FBgn0035591
FBgn0032506		FBgn0035285	FBgn0035044
FBgn0003137		FBgn0031906	FBgn0052038
FBgn0037908		FBgn0035903	FBgn0025592
FBgn0037902		FBgn0039916	FBgn0261552
FBgn0259745		FBgn0032810	FBgn0261004
FBgn0029944		FBgn0004052	FBgn0016685
FBgn0085420		FBgn0003888	FBgn0000996
FBgn0263072		FBgn0033677	FBgn0037358
FBgn0085282		FBgn0028400	FBgn0037608
FBgn0036614		FBgn0004102	FBgn0037354
FBgn0013948		FBgn0035636	FBgn0037607
FBgn0015380		FBgn0034008	FBgn0037468
FBgn0263079		FBgn0052137	FBgn0040931
FBgn0263077		FBgn0052132	FBgn0014863
FBgn0038522		FBgn0025692	FBgn0033075
FBgn0052698		FBgn0037949	FBgn0036551
FBgn0250823		FBgn0259707	FBgn0036553
FBgn0000313		FBgn0030249	FBgn0035926
FBgn0004569		FBgn0030248	FBgn0086451
FBgn0031814		FBgn0033447	FBgn0039125
FBgn0262286		FBgn0036380	FBgn0259704
FBgn0003117		FBgn0032719	FBgn0039128
FBgn0003371		FBgn0037309	FBgn0017566
FBgn0263626		FBgn0030869	FBgn0036949
FBgn0034136		FBgn0023531	FBgn0263446
FBgn0034328		FBgn0039381	FBgn0034722
FBgn0083987		FBgn0046704	FBgn0034728
FBgn0037679		FBgn0087007	FBgn0030406
FBgn0027335		FBgn0034158	FBgn0030407
FBgn0038524		FBgn0031381	FBgn0036835
FBgn0013342		FBgn0017590	FBgn0036838
FBgn0086910		FBgn0262891	FBgn0026751
FBgn0028906		FBgn0031775	FBgn0014189
FBgn0030805		FBgn0033876	FBgn0260944
FBgn0082582		FBgn0033872	FBgn0036762
FBgn0014343		FBgn0040395	FBgn0036763
FBgn0262871		FBgn0040391	FBgn0032002
FBgn0013759		FBgn0040397	FBgn0037010
FBgn0041706		FBgn0033657	FBgn0053054
FBgn0005391		FBgn0032838	FBgn0263200
FBgn0031305		FBgn0028421	FBgn0053230
FBgn0015793		FBgn0033243	FBgn0038893
FBgn0004919		FBgn0037923	FBgn0033718
FBgn0038814		FBgn0259099	FBgn0033715
FBgn0052476		FBgn0058178	FBgn0022936
FBgn0039734		FBgn0030847	FBgn0024992
FBgn0262742		FBgn0029761	FBgn0035710
FBgn0039152		FBgn0052815	FBgn0002673
FBgn0261261		FBgn0261984	FBgn0038144
FBgn0020278		FBgn0028369	FBgn0003676
FBgn0016059		FBgn0035179	FBgn0260789
FBgn0038917		FBgn0020391	FBgn0037531
FBgn0019809		FBgn0052369	FBgn0030092
FBgn0032895		FBgn0033815	FBgn0261786
FBgn0010407		FBgn0031675	FBgn0034390
FBgn0259834		FBgn0041605	FBgn0034399
FBgn0016754		FBgn0036285	FBgn0030672
FBgn0034650		FBgn0038330	FBgn0030676
FBgn0000464		FBgn0039883	FBgn0030679
FBgn0085323		FBgn0002609	FBgn0030678
FBgn0051291		FBgn0052177	FBgn0011764
FBgn0032233		FBgn0052179	FBgn0261976
FBgn0250789		FBgn0032506	FBgn0036029
FBgn0039157		FBgn0003137	FBgn0015602
FBgn0016930		FBgn0037908	FBgn0001139
FBgn0038682		FBgn0037902	FBgn0039415
FBgn0034518		FBgn0259745	FBgn0037565
FBgn0051816		FBgn0040079	FBgn0039970
FBgn0010309		FBgn0029944	FBgn0034578
FBgn0010300		FBgn0085421	FBgn0083025
FBgn0036980		FBgn0085420	FBgn0083023
FBgn0002576		FBgn0085282	FBgn0032631
FBgn0043806		FBgn0036618	FBgn0024293
FBgn0263197		FBgn0036614	FBgn0037707
FBgn0024941		FBgn0086062	FBgn0037817
FBgn0263219		FBgn0015380	FBgn0037816
FBgn0016032		FBgn0066365	FBgn0037815
FBgn0025790		FBgn0262213	FBgn0037810
FBgn0259109		FBgn0263079	FBgn0003423
FBgn0259108		FBgn0263072	FBgn0034027
FBgn0259100		FBgn0263077	FBgn0263460
FBgn0039749		FBgn0038522	FBgn0034709
FBgn0040796		FBgn0052698	FBgn0034703
FBgn0085367		FBgn0259972	FBgn0263133
FBgn0085369		FBgn0250823	FBgn0038678
FBgn0033983		FBgn0000313	FBgn0038673
FBgn0015791		FBgn0037130	FBgn0030468
FBgn0033791		FBgn0025833	FBgn0034569
FBgn0033793		FBgn0031697	FBgn0040653
FBgn0035720		FBgn0039923	FBgn0036886
FBgn0051076		FBgn0050101	FBgn0036889
FBgn0025936		FBgn0033347	FBgn0010397
FBgn0037619		FBgn0033168	FBgn0260965
FBgn0039723		FBgn0004567	FBgn0260960
FBgn0259685		FBgn0004569	FBgn0260962
FBgn0031490		FBgn0031814	FBgn0002719
FBgn0035260		FBgn0262286	FBgn0085466
FBgn0004666		FBgn0262282	FBgn0036702
FBgn0034069		FBgn0003371	FBgn0033507
FBgn0260458		FBgn0010497	FBgn0032283
FBgn0003295		FBgn0263626	FBgn0032282
FBgn0030766		FBgn0034136	FBgn0032026
FBgn0260451		FBgn0034328	FBgn0032029
FBgn0262141		FBgn0083987	FBgn0032285
FBgn0041723		FBgn0051997	FBgn0032286
FBgn0016975		FBgn0037679	FBgn0050154
FBgn0011259		FBgn0082582	FBgn0035550
FBgn0004875		FBgn0014343	FBgn0035557
FBgn0036821		FBgn0027335	FBgn0038878
FBgn0015400		FBgn0038524	FBgn0033737
FBgn0002917		FBgn0013342	FBgn0035088
FBgn0052006		FBgn0086913	FBgn0035082
FBgn0051363		FBgn0086910	FBgn0035083
FBgn0033438		FBgn0028906	FBgn0035770
FBgn0051118		FBgn0262871	FBgn0002306
FBgn0004854		FBgn0000464	FBgn0002652
FBgn0041097		FBgn0027101	FBgn0262619
FBgn0034720		FBgn0051291	FBgn0029167
FBgn0052638		FBgn0085323	FBgn0031252
FBgn0021764		FBgn0032233	FBgn0030610
FBgn0039709		FBgn0250789	FBgn0011703
FBgn0052639		FBgn0032895	FBgn0027903
FBgn0260993		FBgn0013759	FBgn0262515
FBgn0035936		FBgn0013753	FBgn0028434
FBgn0024841		FBgn0064227	FBgn0034915
FBgn0052699		FBgn0010407	FBgn0028436
FBgn0032614		FBgn0259834	FBgn0034919
FBgn0038665		FBgn0016754	FBgn0033038
FBgn0052553		FBgn0261261	FBgn0036514
FBgn0053200		FBgn0020278	FBgn0015664
FBgn0024187		FBgn0016059	FBgn0014396
FBgn0011758		FBgn0034650	FBgn0014395
FBgn0031753		FBgn0038143	FBgn0032397
FBgn0039286		FBgn0050021	FBgn0035872
FBgn0036485		FBgn0038917	FBgn0259678
FBgn0010415		FBgn0019809	FBgn0039869
FBgn0035574		FBgn0004919	FBgn0035876
FBgn0033358		FBgn0032935	FBgn0039862
FBgn0036847		FBgn0052657	FBgn0039867
FBgn0033031		FBgn0052383	FBgn0002466
FBgn0085413		FBgn0038814	FBgn0037834
FBgn0000024		FBgn0052476	FBgn0010620
FBgn0085414		FBgn0039734	FBgn0034217
FBgn0001316		FBgn0262742	FBgn0261356
FBgn0263218		FBgn0039152	FBgn0263483
FBgn0033652		FBgn0039157	FBgn0031068
FBgn0243513		FBgn0033798	FBgn0030828
FBgn0003430		FBgn0039487	FBgn0039403
FBgn0035768		FBgn0016930	FBgn0034769
FBgn0259166		FBgn0039480	FBgn0031062
FBgn0030607		FBgn0038682	FBgn0011571
FBgn0030600		FBgn0034518	FBgn0010621
FBgn0085405		FBgn0051816	FBgn0011206
FBgn0011771		FBgn0037798	FBgn0030912
FBgn0051176		FBgn0010309	FBgn0039691
FBgn0033268		FBgn0010300	FBgn0037615
FBgn0083963		FBgn0036980	FBgn0021944
FBgn0013334		FBgn0002576	FBgn0036728
FBgn0036529		FBgn0043806	FBgn0004797
FBgn0036544		FBgn0263197	FBgn0037051
FBgn0250867		FBgn0024941	FBgn0035878
FBgn0035957		FBgn0263219	FBgn0050069
FBgn0035953		FBgn0016032	FBgn0263241
FBgn0001105		FBgn0038165	FBgn0036187
FBgn0037554		FBgn0040900	FBgn0032408
FBgn0038606		FBgn0259109	FBgn0033754
FBgn0030474		FBgn0259108	FBgn0028540
FBgn0038596		FBgn0259100	FBgn0028543
FBgn0037409		FBgn0039749	FBgn0028544
FBgn0085384		FBgn0040796	FBgn0039250
FBgn0031716		FBgn0039170	FBgn0035755
FBgn0004784		FBgn0032911	FBgn0002638
FBgn0037028		FBgn0035246	FBgn0260743
FBgn0004167		FBgn0259481	FBgn0029148
FBgn0263111		FBgn0035243	FBgn0259991
FBgn0028572		FBgn0052676	FBgn0042693
FBgn0030597		FBgn0052677	FBgn0030584
FBgn0030596		FBgn0052675	FBgn0000244
FBgn0038592		FBgn0025790	FBgn0031186
FBgn0002643		FBgn0011279	FBgn0036862
FBgn0035104		FBgn0039282	FBgn0016119
FBgn0029157		FBgn0085367	FBgn0011722
FBgn0052187		FBgn0085369	FBgn0030052
FBgn0032627		FBgn0033983	FBgn0030056
FBgn0030594		FBgn0015791	FBgn0030054
FBgn0040987		FBgn0015793	FBgn0038821
FBgn0033249		FBgn0260995	FBgn0034933
FBgn0032741		FBgn0033793	FBgn0033581
FBgn0036962		FBgn0051076	FBgn0033580
FBgn0004592		FBgn0025936	FBgn0015391
FBgn0027932		FBgn0039723	FBgn0015393
FBgn0033229		FBgn0037619	FBgn0067905
FBgn0085250		FBgn0040928	FBgn0004362
FBgn0004595		FBgn0259685	FBgn0032189
FBgn0039718		FBgn0085281	FBgn0037632
FBgn0052354		FBgn0031490	FBgn0034500
FBgn0261046		FBgn0035260	FBgn0262442
FBgn0037848		FBgn0004666	FBgn0034853
FBgn0052183		FBgn0034069	FBgn0022288
FBgn0262476		FBgn0260458	FBgn0003206
FBgn0040305		FBgn0003295	FBgn0037853
FBgn0031554		FBgn0030766	FBgn0037852
FBgn0037697		FBgn0260451	FBgn0042206
FBgn0262456		FBgn0041723	FBgn0002924
FBgn0034070		FBgn0016975	FBgn0063498
FBgn0035976		FBgn0011259	FBgn0022160
FBgn0037824		FBgn0036821	FBgn0001986
FBgn0054007		FBgn0015400	FBgn0063492
FBgn0028984		FBgn0002917	FBgn0063493
FBgn0083942		FBgn0052006	FBgn0063494
FBgn0083949		FBgn0051363	FBgn0063495
FBgn0014388		FBgn0004875	FBgn0259697
FBgn0041582		FBgn0039286	FBgn0031519
FBgn0037849		FBgn0036485	FBgn0026089
FBgn0015589		FBgn0010415	FBgn0036892
FBgn0261873		FBgn0035574	FBgn0040832
FBgn0036341		FBgn0033358	FBgn0010602
FBgn0030895		FBgn0053200	FBgn0082928
FBgn0037115		FBgn0024187	FBgn0031389
FBgn0261613		FBgn0011758	FBgn0010217
FBgn0260935		FBgn0043021	FBgn0000053
FBgn0034266		FBgn0031753	FBgn0033918
FBgn0033960		FBgn0000216	FBgn0033919
FBgn0037060		FBgn0259145	FBgn0033913
FBgn0053653		FBgn0035995	FBgn0034401
FBgn0034022		FBgn0262381	FBgn0035517
FBgn0004618		FBgn0051118	FBgn0037070
FBgn0037469		FBgn0004854	FBgn0037073
FBgn0037042		FBgn0041097	FBgn0004117
FBgn0046874		FBgn0034720	FBgn0036301
FBgn0034417		FBgn0052638	FBgn0013988
FBgn0035500		FBgn0021764	FBgn0052528
FBgn0259213		FBgn0039709	FBgn0039306
FBgn0036319		FBgn0035936	FBgn0039305
FBgn0250908		FBgn0260993	FBgn0032422
FBgn0034410		FBgn0053547	FBgn0259203
FBgn0037375		FBgn0024841	FBgn0039336
FBgn0037623		FBgn0052699	FBgn0034406
FBgn0032470		FBgn0032614	FBgn0037249
FBgn0003515		FBgn0263456	FBgn0044324
FBgn0004359		FBgn0038665	FBgn0038974
FBgn0040367		FBgn0036847	FBgn0015805
FBgn0032264		FBgn0033031	FBgn0263521
FBgn0032221		FBgn0085413	FBgn0027617
FBgn0016126		FBgn0000024	FBgn0038799
FBgn0000114		FBgn0085414	FBgn0030037
FBgn0029082		FBgn0032017	FBgn0033210
FBgn0259236		FBgn0001316	FBgn0029873
FBgn0035481		FBgn0263218	FBgn0029870
FBgn0262394		FBgn0033652	FBgn0004611
FBgn0052085		FBgn0243513	FBgn0003479
FBgn0040554		FBgn0030065	FBgn0010292
FBgn0031320		FBgn0259166	FBgn0065059
FBgn0030961		FBgn0030600	FBgn0037544
FBgn0035521		FBgn0085405	FBgn0023001
FBgn0035520		FBgn0011771	FBgn0039404
FBgn0036338		FBgn0051176	FBgn0032162
FBgn0262718		FBgn0033268	FBgn0032166
FBgn0035648		FBgn0083963	FBgn0032168
FBgn0037265		FBgn0036529	FBgn0065057
FBgn0050380		FBgn0036544	FBgn0037573
FBgn0050011		FBgn0250867	FBgn0033471
FBgn0036330		FBgn0013334	FBgn0032261
FBgn0030514		FBgn0262437	FBgn0001086
FBgn0085335		FBgn0262433	FBgn0050499
FBgn0262401		FBgn0035953	FBgn0039829
FBgn0038432		FBgn0003430	FBgn0050491
FBgn0027594		FBgn0001105	FBgn0035309
FBgn0034180		FBgn0037554	FBgn0024360
FBgn0030571		FBgn0030479	FBgn0036536
FBgn0031488		FBgn0030474	FBgn0037491
FBgn0031957		FBgn0037409	FBgn0039563
FBgn0031955		FBgn0085384	FBgn0031678
FBgn0033884		FBgn0004784	FBgn0040813
FBgn0003460		FBgn0037028	FBgn0027559
FBgn0263352		FBgn0004167	FBgn0034641
FBgn0023489		FBgn0263111	FBgn0050022
FBgn0015609		FBgn0028572	FBgn0050418
FBgn0037665		FBgn0038596	FBgn0010220
FBgn0036139		FBgn0261041	FBgn0021895
FBgn0038220		FBgn0030597	FBgn0010222
FBgn0015558		FBgn0030596	FBgn0035829
FBgn0262624		FBgn0038592	FBgn0005655
FBgn0040348		FBgn0035104	FBgn0028856
FBgn0051713		FBgn0029157	FBgn0260477
FBgn0000363		FBgn0032627	FBgn0032444
FBgn0262023		FBgn0259985	FBgn0262354
FBgn0037742		FBgn0030594	FBgn0030759
FBgn0025742		FBgn0040987	FBgn0003714
FBgn0039054		FBgn0026393	FBgn0040001
FBgn0024232		FBgn0033249	FBgn0260388
FBgn0028671		FBgn0032741	FBgn0000546
FBgn0260793		FBgn0050201	FBgn0030753
FBgn0261085		FBgn0028984	FBgn0027791
FBgn0261086		FBgn0083942	FBgn0027794
FBgn0263455		FBgn0083949	FBgn0035150
FBgn0029864		FBgn0014388	FBgn0041164
FBgn0038693		FBgn0041582	FBgn0027571
FBgn0040752		FBgn0262456	FBgn0038181
FBgn0038926		FBgn0034070	FBgn0038183
FBgn0030742		FBgn0035976	FBgn0085203
FBgn0033628		FBgn0010408	FBgn0036691
FBgn0034224		FBgn0002937	FBgn0015544
FBgn0031611		FBgn0037824	FBgn0015546
FBgn0085216		FBgn0054007	FBgn0263347
FBgn0037539		FBgn0052183	FBgn0038951
FBgn0011305		FBgn0052187	FBgn0035499
FBgn0030680		FBgn0262476	FBgn0035498
FBgn0011300		FBgn0040305	FBgn0029798
FBgn0016794		FBgn0037697	FBgn0035679
FBgn0262907		FBgn0085250	FBgn0031011
FBgn0000557		FBgn0033229	FBgn0029791
FBgn0033885		FBgn0027932	FBgn0086783
		FBgn0034255	FBgn0003545
		FBgn0004592	FBgn0031231
		FBgn0039718	FBgn0039024
		FBgn0052354	FBgn0039020
		FBgn0261046	FBgn0031232
		FBgn0037849	FBgn0001941
		FBgn0015589	FBgn0029672
		FBgn0261873	FBgn0011455
		FBgn0036341	FBgn0029094
		FBgn0030895	FBgn0033890
		FBgn0260935	FBgn0031942
		FBgn0034266	FBgn0031492
		FBgn0033960	FBgn0038771
		FBgn0037060	FBgn0015828
		FBgn0053653	FBgn0038774
		FBgn0004618	FBgn0030544
		FBgn0037469	FBgn0036916
		FBgn0034417	FBgn0027949
		FBgn0035504	FBgn0010278
		FBgn0035505	FBgn0034259
		FBgn0035500	FBgn0036334
		FBgn0036319	FBgn0027493
		FBgn0250908	FBgn0032329
		FBgn0034410	FBgn0051098
		FBgn0037375	FBgn0028841
		FBgn0037623	FBgn0039406
		FBgn0262262	FBgn0039241
		FBgn0259213	FBgn0052709
		FBgn0025742	FBgn0034624
		FBgn0039054	FBgn0083123
		FBgn0000273	FBgn0039349
		FBgn0028671	FBgn0259243
		FBgn0261086	FBgn0039004
		FBgn0029864	FBgn0042185
		FBgn0037696	FBgn0011474
		FBgn0038693	FBgn0035113
		FBgn0040752	FBgn0035112
		FBgn0038926	FBgn0259113
		FBgn0030742	FBgn0034447
		FBgn0033628	FBgn0034194
		FBgn0031611	FBgn0031961
		FBgn0034224	FBgn0034442
		FBgn0085216	FBgn0038756
		FBgn0037539	FBgn0004426
		FBgn0260793	FBgn0034229
		FBgn0085218	FBgn0034223
		FBgn0011305	FBgn0038832
		FBgn0011300	FBgn0030692
		FBgn0016794	FBgn0039233
		FBgn0262907	FBgn0020633
		FBgn0000557	FBgn0036754
		FBgn0033885	FBgn0032129
		FBgn0030680	FBgn0036595
		FBgn0040348	FBgn0036599
		FBgn0051713	FBgn0032873
		FBgn0000363	FBgn0032870
		FBgn0037742	FBgn0032698
		FBgn0037665	FBgn0002021
		FBgn0038247	FBgn0036920
		FBgn0038220	FBgn0261808
		FBgn0262624	FBgn0024329
		FBgn0015558	FBgn0024891
		FBgn0035815	FBgn0003733
		FBgn0005672	FBgn0003732
		FBgn0027594	FBgn0038806
		FBgn0038432	FBgn0002607
		FBgn0262401	FBgn0260049
		FBgn0085335	FBgn0086613
		FBgn0262406	FBgn0030504
		FBgn0263575	FBgn0085254
		FBgn0031955	FBgn0000560
		FBgn0031957	FBgn0033378
		FBgn0031488	FBgn0039613
		FBgn0030571	FBgn0031574
		FBgn0033884	FBgn0034058
		FBgn0003460	FBgn0030738
		FBgn0263352	FBgn0085194
		FBgn0023489	FBgn0027513
		FBgn0015609	FBgn0002872
		FBgn0035648	FBgn0034723
		FBgn0037265	FBgn0015527
		FBgn0050380	FBgn0036365
		FBgn0050011	FBgn0023517
		FBgn0085304	FBgn0023514
		FBgn0035521	FBgn0035868
		FBgn0035520	FBgn0032488
		FBgn0036338	FBgn0004465
		FBgn0036330	FBgn0003502
		FBgn0262718	FBgn0053459
		FBgn0035481	FBgn0053329
		FBgn0262394	FBgn0036574
		FBgn0052085	FBgn0035131
		FBgn0040554	FBgn0000658
		FBgn0031320	FBgn0031908
		FBgn0259239	FBgn0250732
		FBgn0083974	FBgn0038739
		FBgn0029082	FBgn0038737
		FBgn0016126	FBgn0030507
		FBgn0032264	FBgn0030500
		FBgn0030559	FBgn0030501
		FBgn0036926	FBgn0038088
		FBgn0040367	FBgn0030347
		FBgn0004359	FBgn0039049
			FBgn0033859
			FBgn0039045
			FBgn0032105
			FBgn0037770
			FBgn0032811
			FBgn0032818
			FBgn0003885
			FBgn0037149
			FBgn0035639
			FBgn0034001
			FBgn0036191
			FBgn0037943
			FBgn0000500
			FBgn0259709
			FBgn0003312
			FBgn0259700
			FBgn0030241
			FBgn0029971
			FBgn0050377
			FBgn0050373
			FBgn0027537
			FBgn0030718
			FBgn0030246
			FBgn0030242
			FBgn0034468
			FBgn0033446
			FBgn0038274
			FBgn0038272
			FBgn0038275
			FBgn0038271
			FBgn0085378
			FBgn0014903
			FBgn0040496
			FBgn0050085
			FBgn0000667
			FBgn0051450
			FBgn0036121
			FBgn0035842
			FBgn0261015
			FBgn0022069
			FBgn0052831
			FBgn0003074
			FBgn0038532
			FBgn0038470
			FBgn0020376
			FBgn0259938
			FBgn0036124
			FBgn0031040
			FBgn0028962
			FBgn0259937
			FBgn0038717
			FBgn0031655
			FBgn0010213
			FBgn0026619
			FBgn0262096
			FBgn0011296
			FBgn0039407
			FBgn0031540
			FBgn0037710
			FBgn0250754
			FBgn0040394
			FBgn0050410
			FBgn0027259
			FBgn0033389
			FBgn0035431
			FBgn0028426
			FBgn0028427
			FBgn0028424
			FBgn0028422
			FBgn0032388
			FBgn0037926
			FBgn0040092
			FBgn0039650
			FBgn0027889
			FBgn0029958
			FBgn0027081
			FBgn0027083
			FBgn0027084
			FBgn0030260
			FBgn0030263
			FBgn0036142
			FBgn0032161
			FBgn0053145
			FBgn0052816
			FBgn0028360
			FBgn0034176
			FBgn0031419
			FBgn0038805
			FBgn0037481
			FBgn0037489
			FBgn0033788
			FBgn0033994
			FBgn0033817
			FBgn0033810
			FBgn0039467
			FBgn0034828
			FBgn0031677
			FBgn0034177
			FBgn0027279
			FBgn0031418
			FBgn0033107
			FBgn0045035
			FBgn0036460
			FBgn0036462
			FBgn0022893
			FBgn0259742
			FBgn0002906
			FBgn0052732
			FBgn0025382
			FBgn0029711
			FBgn0262511
			FBgn0003130
			FBgn0039679
			FBgn0046113
			FBgn0030086
			FBgn0046114
			FBgn0024920
			FBgn0031089
			FBgn0016675
			FBgn0027868
			FBgn0040075
			FBgn0034618
			FBgn0038107
			FBgn0026630
			FBgn0015019
			FBgn0011818
			FBgn0004956
			FBgn0024364
			FBgn0013949
			FBgn0004103
			FBgn0035996
			FBgn0029522
			FBgn0031498
			FBgn0262647
			FBgn0004889
			FBgn0261927
			FBgn0029525
			FBgn0259977
			FBgn0259979
			FBgn0052438
			FBgn0028920
			FBgn0262707
			FBgn0026872
			FBgn0260632
			FBgn0034118
			FBgn0037138
			FBgn0037137
			FBgn0025835
			FBgn0025832
			FBgn0025839
			FBgn0039449
			FBgn0031692
			FBgn0037552
			FBgn0046301
			FBgn0041627
			FBgn0030271
			FBgn0036263
			FBgn0041607
			FBgn0038318
			FBgn0030101
			FBgn0027291
			FBgn0034802
			FBgn0033696
			FBgn0038312
			FBgn0033160
			FBgn0033169
			FBgn0021995
			FBgn0003480
			FBgn0002534
			FBgn0002535
			FBgn0039208
			FBgn0039209
			FBgn0035696
			FBgn0003257
			FBgn0010416
			FBgn0046685
			FBgn0016075
			FBgn0031868
			FBgn0063923
			FBgn0262112
			FBgn0029999
			FBgn0020306
			FBgn0015039
			FBgn0027620
			FBgn0000299
			FBgn0037670
			FBgn0037676
			FBgn0027339
			FBgn0027330
			FBgn0027334
			FBgn0036094
			FBgn0036096
			FBgn0024734
			FBgn0014340
			FBgn0033970
			FBgn0002183
			FBgn0030000
			FBgn0086912
			FBgn0086917
			FBgn0033473
			FBgn0033100
			FBgn0261524
			FBgn0022774
			FBgn0022772
			FBgn0030322
			FBgn0044030
			FBgn0011236
			FBgn0034797
			FBgn0034793
			FBgn0039566
			FBgn0039117
			FBgn0036422
			FBgn0010660
			FBgn0038376
			FBgn0004584
			FBgn0037093
			FBgn0027552
			FBgn0259785
			FBgn0026533
			FBgn0259789
			FBgn0022349
			FBgn0005617
			FBgn0015585
			FBgn0030796
			FBgn0035766
			FBgn0038146
			FBgn0263600
			FBgn0020272
			FBgn0002873
			FBgn0021874
			FBgn0037301
			FBgn0037305
			FBgn0000140
			FBgn0004629
			FBgn0262743
			FBgn0033557
			FBgn0033554
			FBgn0263031
			FBgn0024754
			FBgn0038964
			FBgn0022708
			FBgn0002709
			FBgn0012036
			FBgn0038811
			FBgn0030433
			FBgn0037883
			FBgn0000442
			FBgn0039159
			FBgn0031306
			FBgn0031308
			FBgn0038953
			FBgn0039482
			FBgn0038914
			FBgn0034885
			FBgn0030309
			FBgn0038680
			FBgn0030304
			FBgn0085300
			FBgn0034883
			FBgn0034517
			FBgn0039302
			FBgn0037792
			FBgn0005666
			FBgn0032218
			FBgn0002570
			FBgn0020255
			FBgn0259818
			FBgn0042085
			FBgn0014861
			FBgn0038519
			FBgn0033129
			FBgn0031824
			FBgn0031170
			FBgn0038160
			FBgn0038161
			FBgn0026315
			FBgn0039748
			FBgn0039741
			FBgn0037329
			FBgn0085343
			FBgn0004391
			FBgn0035640
			FBgn0050285
			FBgn0027375
			FBgn0020414
			FBgn0035644
			FBgn0051789
			FBgn0032919
			FBgn0032915
			FBgn0032910
			FBgn0033379
			FBgn0040078
			FBgn0038989
			FBgn0015270
			FBgn0023444
			FBgn0000392
			FBgn0011274
			FBgn0033690
			FBgn0032343
			FBgn0263413
			FBgn0026761
			FBgn0031589
			FBgn0034290
			FBgn0034537
			FBgn0036208
			FBgn0036759
			FBgn0002931
			FBgn0015799
			FBgn0010328
			FBgn0262160
			FBgn0033475
			FBgn0260991
			FBgn0032050
			FBgn0032051
			FBgn0032054
			FBgn0032586
			FBgn0003600
			FBgn0005278
			FBgn0003607
			FBgn0015271
			FBgn0026059
			FBgn0035588
			FBgn0029133
			FBgn0029689
			FBgn0259876
			FBgn0031771
			FBgn0016013
			FBgn0028886
			FBgn0043002
			FBgn0051133
			FBgn0015279
			FBgn0026373
			FBgn0028530
			FBgn0037618
			FBgn0030646
			FBgn0000181
			FBgn0029891
			FBgn0034583
			FBgn0025815
			FBgn0040923
			FBgn0027356
			FBgn0261618
			FBgn0036569
			FBgn0004406
			FBgn0035917
			FBgn0002121
			FBgn0003268
			FBgn0034065
			FBgn0032644
			FBgn0260455
			FBgn0260456
			FBgn0025117
			FBgn0035722
			FBgn0000405
			FBgn0038390
			FBgn0028744
			FBgn0004959
			FBgn0013548
			FBgn0039118
			FBgn0039111
			FBgn0039112
			FBgn0031344
			FBgn0039868
			FBgn0034735
			FBgn0034734
			FBgn0034086
			FBgn0038643
			FBgn0039120
			FBgn0038647
			FBgn0038649
			FBgn0030344
			FBgn0036770
			FBgn0039126
			FBgn0036778
			FBgn0034888
			FBgn0026741
			FBgn0262146
			FBgn0085345
			FBgn0085342
			FBgn0033351
			FBgn0036486
			FBgn0032252
			FBgn0001332
			FBgn0001330
			FBgn0263231
			FBgn0263237
			FBgn0051706
			FBgn0053205
			FBgn0024188
			FBgn0028533
			FBgn0015299
			FBgn0033777
			FBgn0029117
			FBgn0086856
			FBgn0024984
			FBgn0024986
			FBgn0035707
			FBgn0031286
			FBgn0052554
			FBgn0003082
			FBgn0261790
			FBgn0261794
			FBgn0027495
			FBgn0003087
			FBgn0261791
			FBgn0025781
			FBgn0030081
			FBgn0023181
			FBgn0259143
			FBgn0030660
			FBgn0262720
			FBgn0014879
			FBgn0036686
			FBgn0033063
			FBgn0052344
			FBgn0034143
			FBgn0038074
			FBgn0023180
			FBgn0033060
			FBgn0033065
			FBgn0034727
			FBgn0028982
			FBgn0003278
			FBgn0036994
			FBgn0017577
			FBgn0012051
			FBgn0261286
			FBgn0037369
			FBgn0036990
			FBgn0033304
			FBgn0036843
			FBgn0051301
			FBgn0260959
			FBgn0036713
			FBgn0036710
			FBgn0032010
			FBgn0019957
			FBgn0033653
			FBgn0261974
			FBgn0033059
			FBgn0038869
			FBgn0243511
			FBgn0028515
			FBgn0022943
			FBgn0022942
			FBgn0259718
			FBgn0037549
			FBgn0029174
			FBgn0039094
			FBgn0030603
			FBgn0030061
			FBgn0030067
			FBgn0040030
			FBgn0000239
			FBgn0034387
			FBgn0034389
			FBgn0011770
			FBgn0029823
			FBgn0036764
			FBgn0033264
			FBgn0034966
			FBgn0038057
			FBgn0032452
			FBgn0051793
			FBgn0002899
			FBgn0036030
			FBgn0015268
			FBgn0001124
			FBgn0001125
			FBgn0001120
			FBgn0023395
			FBgn0002772
			FBgn0083032
			FBgn0032603
			FBgn0028707
			FBgn0028700
			FBgn0002789
			FBgn0035379
			FBgn0035372
			FBgn0004463
			FBgn0261360
			FBgn0261362
			FBgn0031078
			FBgn0038608
			FBgn0030478
			FBgn0262987
			FBgn0026702
			FBgn0026257
			FBgn0082975
			FBgn0014028
			FBgn0038601
			FBgn0014023
			FBgn0036501
			FBgn0021761
			FBgn0030291
			FBgn0065096
			FBgn0085474
			FBgn0085475
			FBgn0037025
			FBgn0004107
			FBgn0027073
			FBgn0004106
			FBgn0004169
			FBgn0036627
			FBgn0050052
			FBgn0010520
			FBgn0053970
			FBgn0002641
			FBgn0261530
			FBgn0033741
			FBgn0032298
			FBgn0035743
			FBgn0260779
			FBgn0028397
			FBgn0029158
			FBgn0259989
			FBgn0039073
			FBgn0033342
			FBgn0031711
			FBgn0032453
			FBgn0041180
			FBgn0020887
			FBgn0029849
			FBgn0051156
			FBgn0037561
			FBgn0033246
			FBgn0027914
			FBgn0034908
			FBgn0038038
			FBgn0036668
			FBgn0038035
			FBgn0038037
			FBgn0013435
			FBgn0263143
			FBgn0028490
			FBgn0051321
			FBgn0034073
			FBgn0037822
			FBgn0086445
			FBgn0030976
			FBgn0034214
			FBgn0052982
			FBgn0015360
			FBgn0261439
			FBgn0011661
			FBgn0031500
			FBgn0031057
			FBgn0083017
			FBgn0031052
			FBgn0036959
			FBgn0036888
			FBgn0024227
			FBgn0051522
			FBgn0037610
			FBgn0033089
			FBgn0035076
			FBgn0086130
			FBgn0002431
			FBgn0037846
			FBgn0062442
			FBgn0062440
			FBgn0034920
			FBgn0038016
			FBgn0047133
			FBgn0004378
			FBgn0004379
			FBgn0034756
			FBgn0004374
			FBgn0004370
			FBgn0023519
			FBgn0031191
			FBgn0022213
			FBgn0029867
			FBgn0026250
			FBgn0030026
			FBgn0261789
			FBgn0033221
			FBgn0035151
			FBgn0082951
			FBgn0082957
			FBgn0039689
			FBgn0039680
			FBgn0000064
			FBgn0030301
			FBgn0033900
			FBgn0037046
			FBgn0037044
			FBgn0010423
			FBgn0263251
			FBgn0038827
			FBgn0035501
			FBgn0037377
			FBgn0028554
			FBgn0028550
			FBgn0039338
			FBgn0032414
			FBgn0086347
			FBgn0259216
			FBgn0023513
			FBgn0039051
			FBgn0027602
			FBgn0031263
			FBgn0031265
			FBgn0027603
			FBgn0035336
			FBgn0037376
			FBgn0030122
			FBgn0037371
			FBgn0031047
			FBgn0010100
			FBgn0034007
			FBgn0031528
			FBgn0026079
			FBgn0034657
			FBgn0082939
			FBgn0082935
			FBgn0037204
			FBgn0000045
			FBgn0039555
			FBgn0039226
			FBgn0027621
			FBgn0000046
			FBgn0000044
			FBgn0035838
			FBgn0052251
			FBgn0036337
			FBgn0038207
			FBgn0035529
			FBgn0010173
			FBgn0038243
			FBgn0030156
			FBgn0261479
			FBgn0064115
			FBgn0032346
			FBgn0038948
			FBgn0039358
			FBgn0261266
			FBgn0032840
			FBgn0001091
			FBgn0001098
			FBgn0039828
			FBgn0025458
			FBgn0261858
			FBgn0029608
			FBgn0052278
			FBgn0030552
			FBgn0030554
			FBgn0017578
			FBgn0033571
			FBgn0010263
			FBgn0023542
			FBgn0032157
			FBgn0037106
			FBgn0034087
			FBgn0036336
			FBgn0262719
			FBgn0002354
			FBgn0032782
			FBgn0032783
			FBgn0033579
			FBgn0032430
			FBgn0086361
			FBgn0025388
			FBgn0029994
			FBgn0004832
			FBgn0261065
			FBgn0261068
			FBgn0259209
			FBgn0263510
			FBgn0020305
			FBgn0020909
			FBgn0032513
			FBgn0029882
			FBgn0029881
			FBgn0029885
			FBgn0034494
			FBgn0034496
			FBgn0034497
			FBgn0261609
			FBgn0033434
			FBgn0030743
			FBgn0030745
			FBgn0010434
			FBgn0027783
			FBgn0011659
			FBgn0010438
			FBgn0029929
			FBgn0036117
			FBgn0260795
			FBgn0000559
			FBgn0260768
			FBgn0026787
			FBgn0262902
			FBgn0016792
			FBgn0261454
			FBgn0000556
			FBgn0015376
			FBgn0039849
			FBgn0035665
			FBgn0003701
			FBgn0037741
			FBgn0011656
			FBgn0262563
			FBgn0262560
			FBgn0043456
			FBgn0017457
			FBgn0031484
			FBgn0263573
			FBgn0261628
			FBgn0031951
			FBgn0030628
			FBgn0031145
			FBgn0030574
			FBgn0030570
			FBgn0033889
			FBgn0037611
			FBgn0030687
			FBgn0030686
			FBgn0047178
			FBgn0040346
			FBgn0036918
			FBgn0037746
			FBgn0025578
			FBgn0033926
			FBgn0033081
			FBgn0032860
			FBgn0001565
			FBgn0030740
			FBgn0035480
			FBgn0037578
			FBgn0030943
			FBgn0000711
			FBgn0263605
			FBgn0003687
			FBgn0050383
			FBgn0033945
			FBgn0011020
			FBgn0036689
			FBgn0034688
			FBgn0040477
			FBgn0015570
			FBgn0040773
			FBgn0035813
			FBgn0035812
			FBgn0036354
			FBgn0037749
			FBgn0027596
			FBgn0038860
			FBgn0028665
			FBgn0032455
			FBgn0032450
			FBgn0001977
			FBgn0003022
			FBgn0031227
